# Supplementary material
Source: MDPI journal article supplement (https://www.mdpi.com/2073-4441/9/11/879)
Supplement: s1 [file s1]

# A Combined Hydrological and Hydraulic Model for Flood Prediction in Vietnam Applied to the Huong River Basin as a Test Case Study

**Table S1.** Calibrated parameters of the WetSpa model with 95% confidence intervals for the three upstream sub-catchments of the Huong River (for details about the WetSpa parameters, see [21]).

| Symbol | Parameters                                           | Sub-catchment      |                      |                 |
|--------|------------------------------------------------------|--------------------|----------------------|-----------------|
|        |                                                      | Ta Trach           | Huu Trach            | Bo              |
| ki     | Interflow scaling factor (-)                         | 4.25 ± 0.21        | 5.70 ± 0.32          | 2.5 ± 0.25      |
| kg     | Groundwater recession coefficient (6h) <sup>-1</sup> | 0.0014 ±<br>0.0003 | 0.00255 ±<br>0.00051 | 0.0073 ± 0.0011 |
| k_ss   | Initial soil moisture (-)                            | 0.85 ± 0.15        | 1.27 ± 0.22          | 0.68 ± 0.12     |
| k_ep   | Correction factor for PET (-)                        | 1.16 ± 0.12        | 1.28 ± 0.1           | 1.24 ± 0.15     |
| g0     | Initial ground water storage (mm)                    | 50 ± 10            | 106 ± 20             | 64 ± 11         |
| g_max  | Groundwater storage scaling factor (mm)              | 327 ± 56           | 206 ± 38             | 225 ± 44        |
| k_run  | Surface runoff exponent (-)                          | 7.4 ± 0.3          | 4.48 ± 0.27          | 3.9 ± 0.43      |
| p_max  | Rainfall intensity scaling factor (mm/6h)            | 42.2 ± 18.5        | 43.7 ± 17.9          | 62.7 ± 18.7     |

**Table S2.** Calibrated Manning coefficients of the HEC-RAS model for the 11 river reaches of the Huong floodplain (for the location of the river reaches see Figure S1).

| No. | Reach     | Manning coefficient |             |
|-----|-----------|---------------------|-------------|
|     |           | Main channel        | River banks |
| 1   | Huong 3   | 0.023               | 0.125       |
| 2   | Huong 4   | 0.027               | 0.135       |
| 3   | Huong 5   | 0.033               | 0.140       |
| 4   | Huong 6   | 0.033               | 0.140       |
| 5   | La Y      | 0.035               | 0.135       |
| 6   | Dai Giang | 0.035               | 0.135       |
| 7   | Song Bo 1 | 0.033               | 0.135       |
| 8   | Song Bo 2 | 0.035               | 0.140       |
| 9   | An Xuan   | 0.035               | 0.140       |
| 10  | Ta Trach  | 0.020               | 0.150       |
| 11  | Huu Trach | 0.020               | 0.150       |

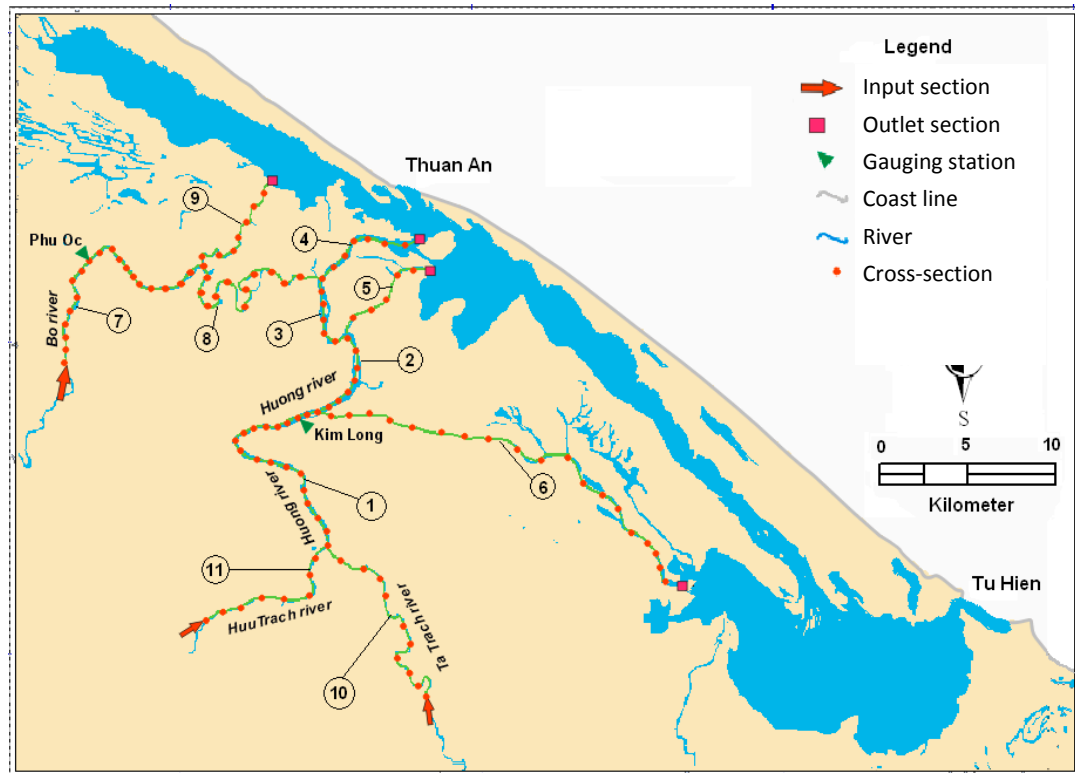

**Figure S1.** Layout of the hydraulic model in the Huong floodplain, showing the eleven river reaches, three upstream end sections with inflow from the upstream sub-catchments, four downstream end sections with outflow to coastal lagoons, and location of the surveyed cross sections.

A

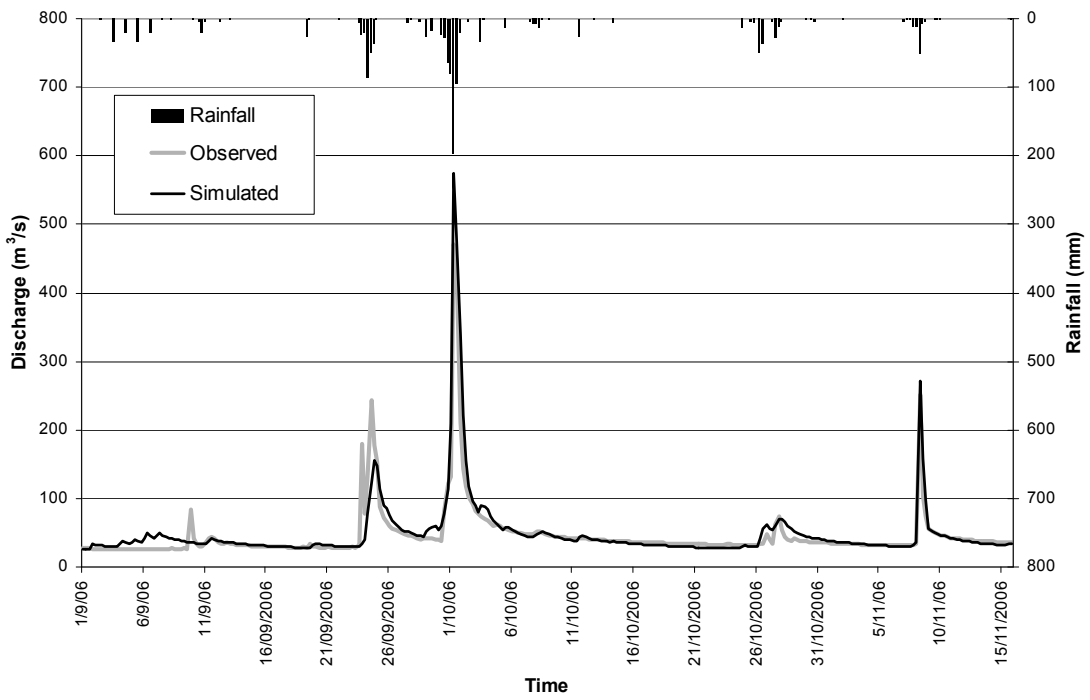

B

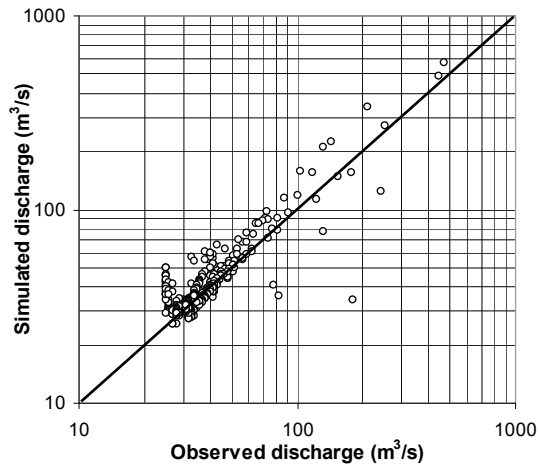

C

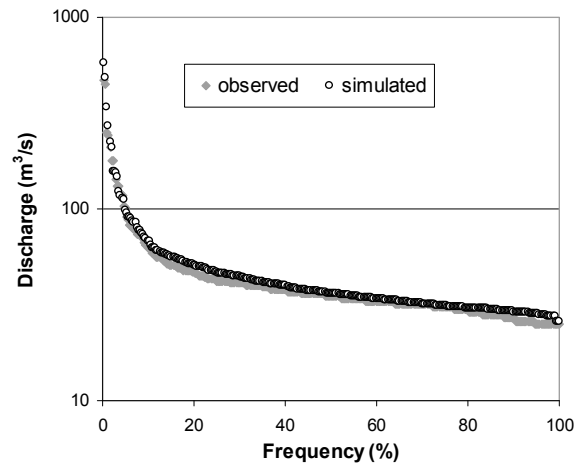

**Figure S2.** Comparison between simulated and observed flow for the 2006 flood season at the Thuong Nhat gauging station at the Ta Trach river: (a) observed and simulated 6-hourly flow versus time; (b) scatter plot of observed versus simulated flow; (c) ranked observed and simulated flow.

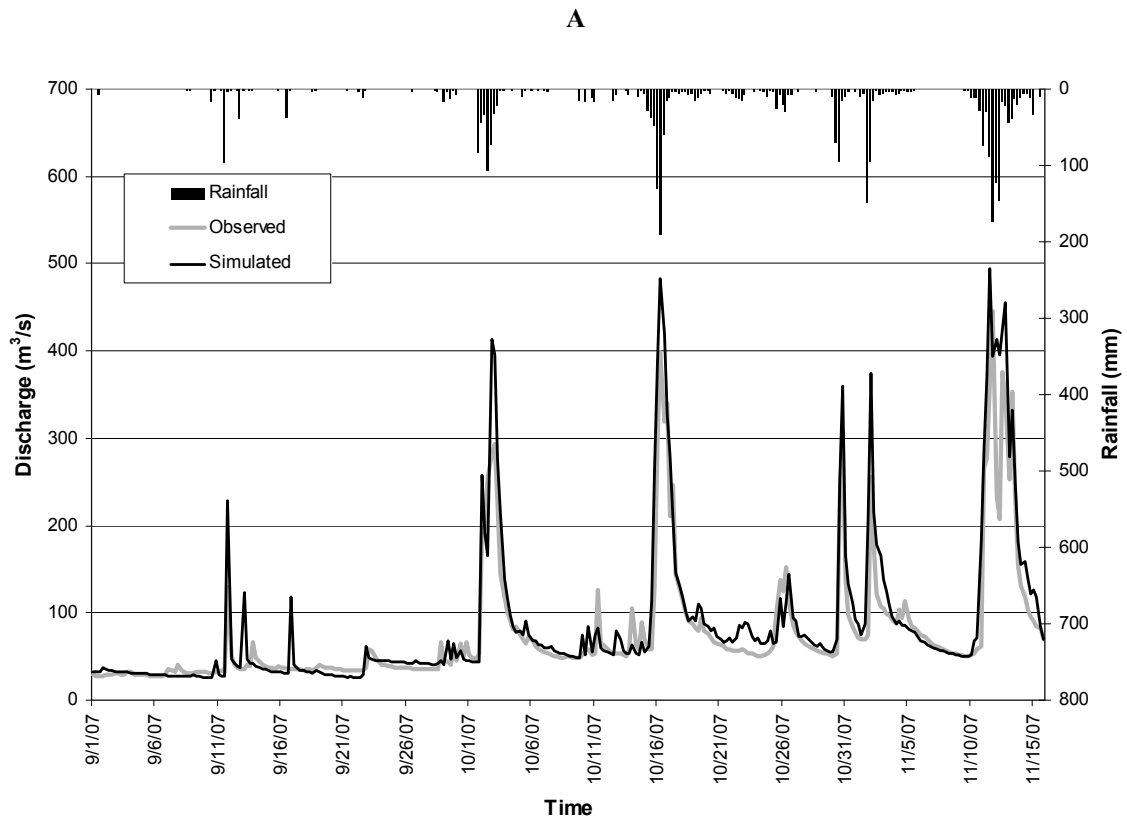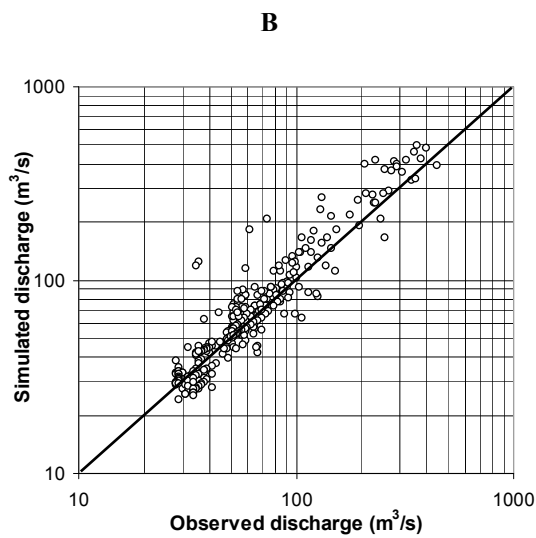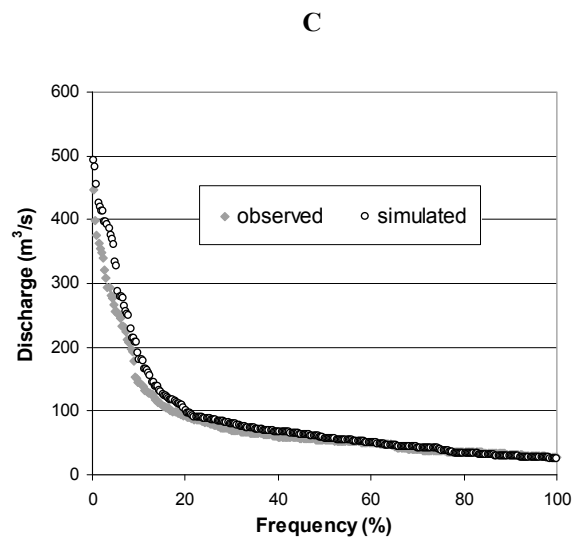

**Figure S3.** Comparison between simulated and observed flow for the 2007 flood season at the Thuong Nhat gauging station at the Ta Trach river: (a) observed and simulated 6-hourly flow versus time; (b) scatter plot of observed versus simulated flow; (c) ranked observed and simulated flow.

A

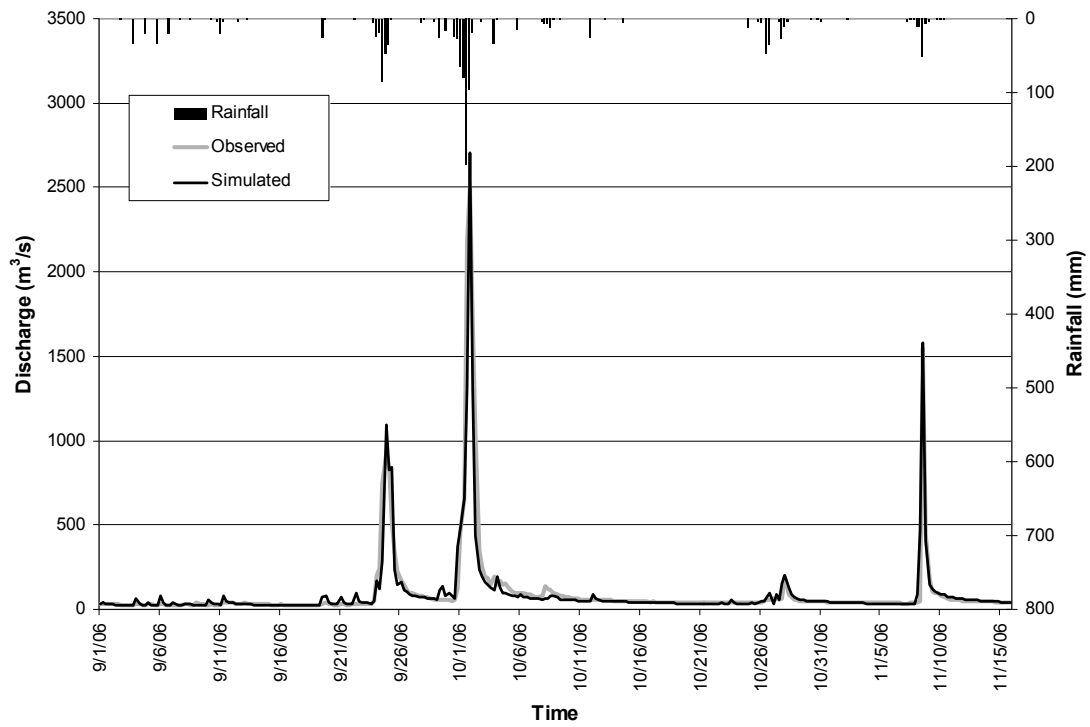

B

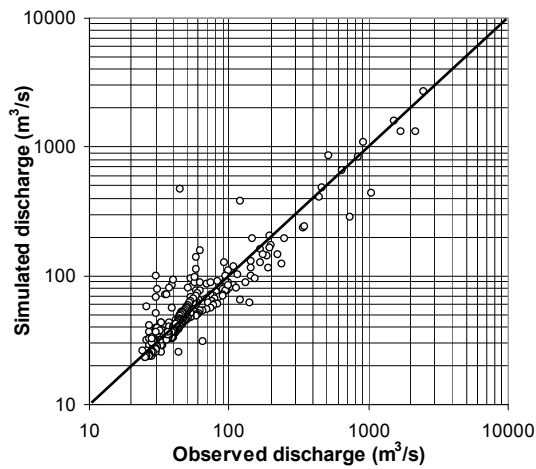

C

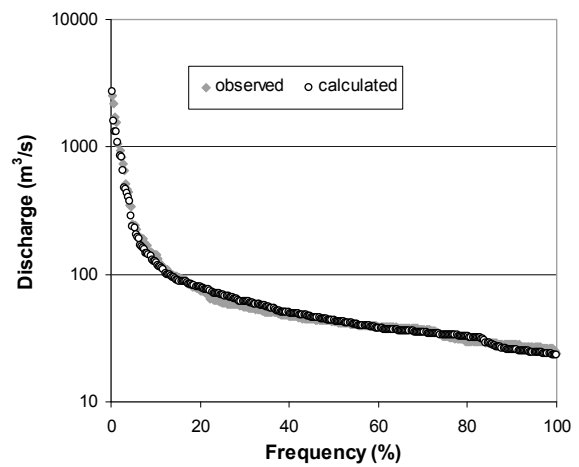

**Figure S4.** Comparison between simulated and observed flow for the 2006 flood season at the Binh Dien gauging station at the Huu Trach River: (a) observed and simulated 6-hourly flow versus time; (b) scatter plot of observed versus simulated flow; (c) ranked observed and simulated flow.

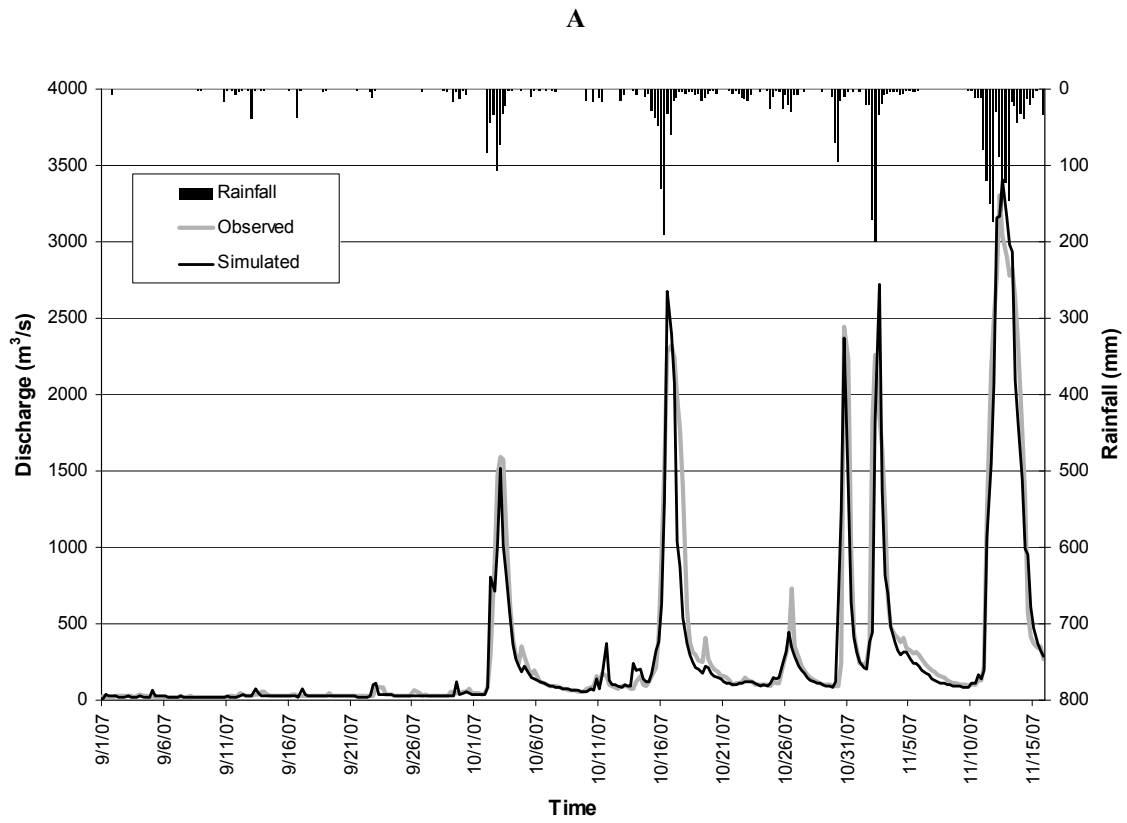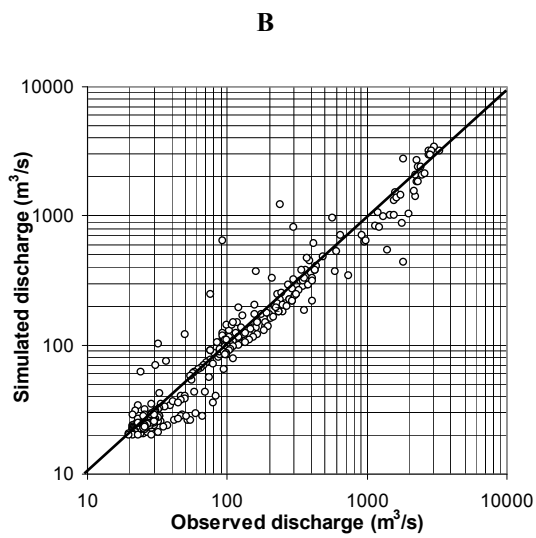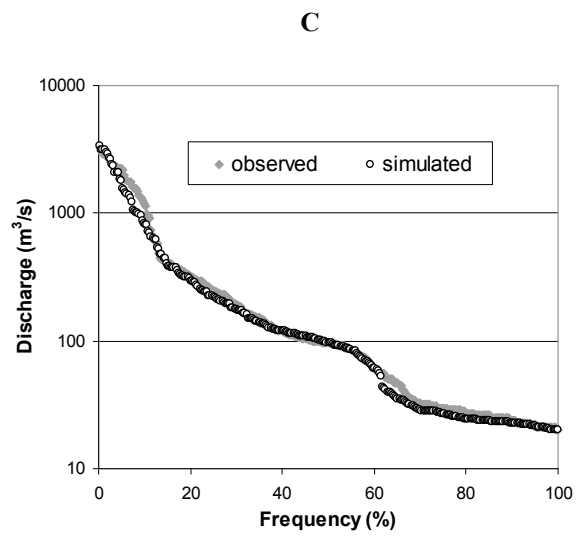

**Figure S5.** Comparison between simulated and observed flow for the 2007 flood season at the Binh Dien gauging station at the Huu Trach River: (a) observed and simulated 6-hourly flow versus time; (b) scatter plot of observed versus simulated flow; (c) ranked observed and simulated flow.

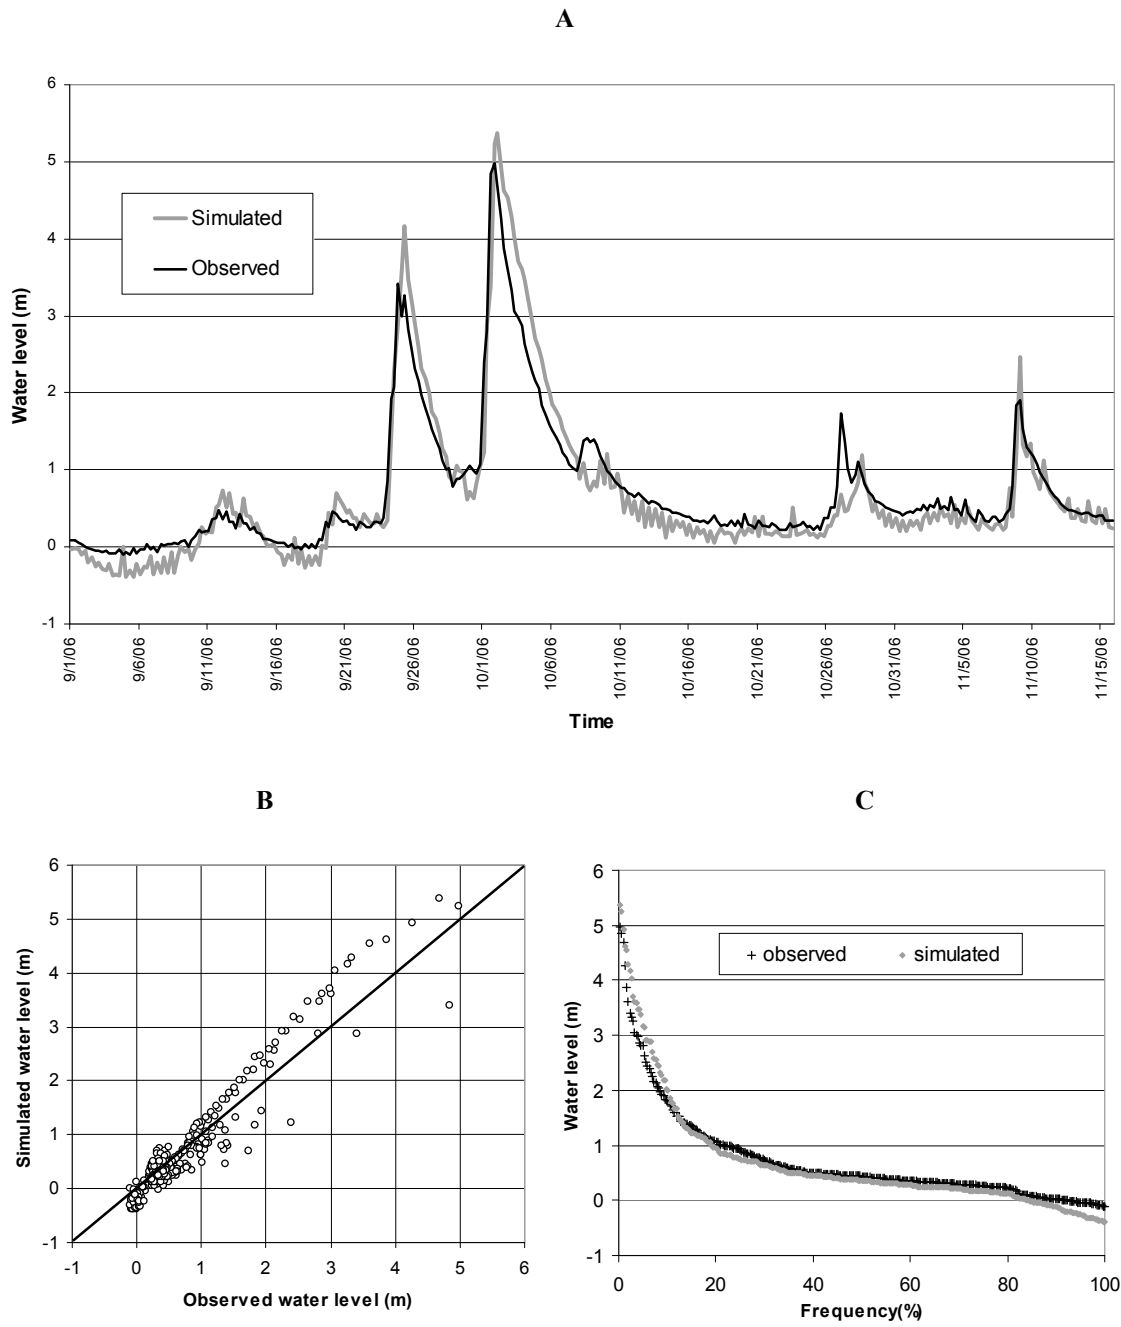

**Figure S6.** Comparison between simulated and observed water surface level for the 2006 flood season at the Phu Oc gauging station at the Bo River: (a) observed and simulated 6-hourly water level versus time; (b) scatter plot of observed versus simulated water level; (c) ranked observed and simulated water level.



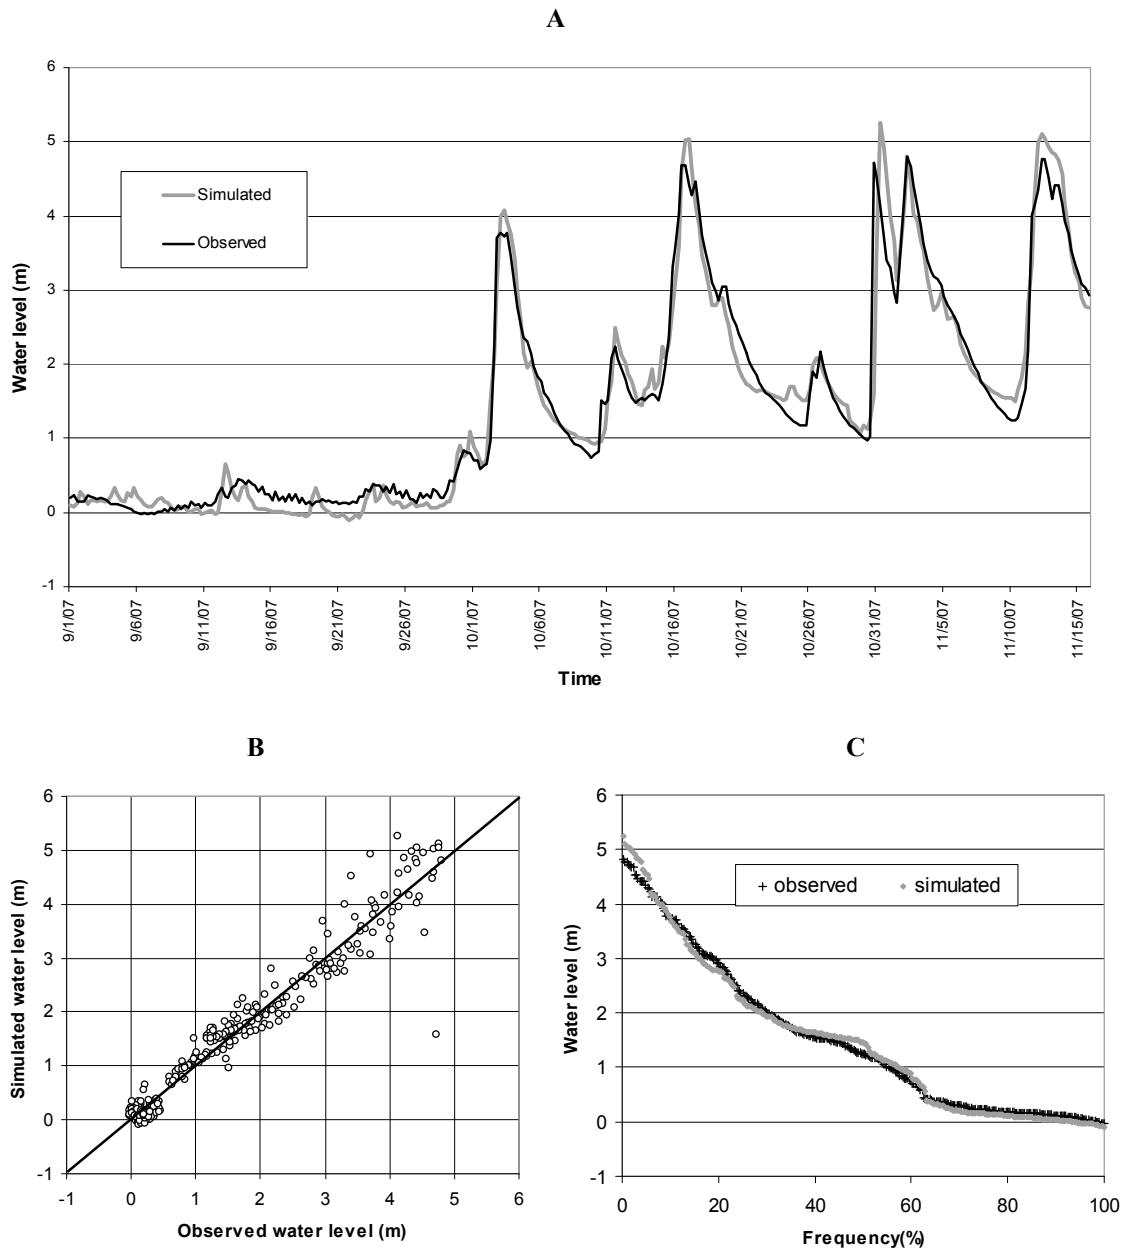

**Figure S7.** Comparison between simulated and observed water surface level for the 2007 flood season at the Phu Oc gauging station at the Bo River: (a) observed and simulated 6-hourly water level versus time; (b) scatter plot of observed versus simulated water level; (c) ranked observed and simulated water level.

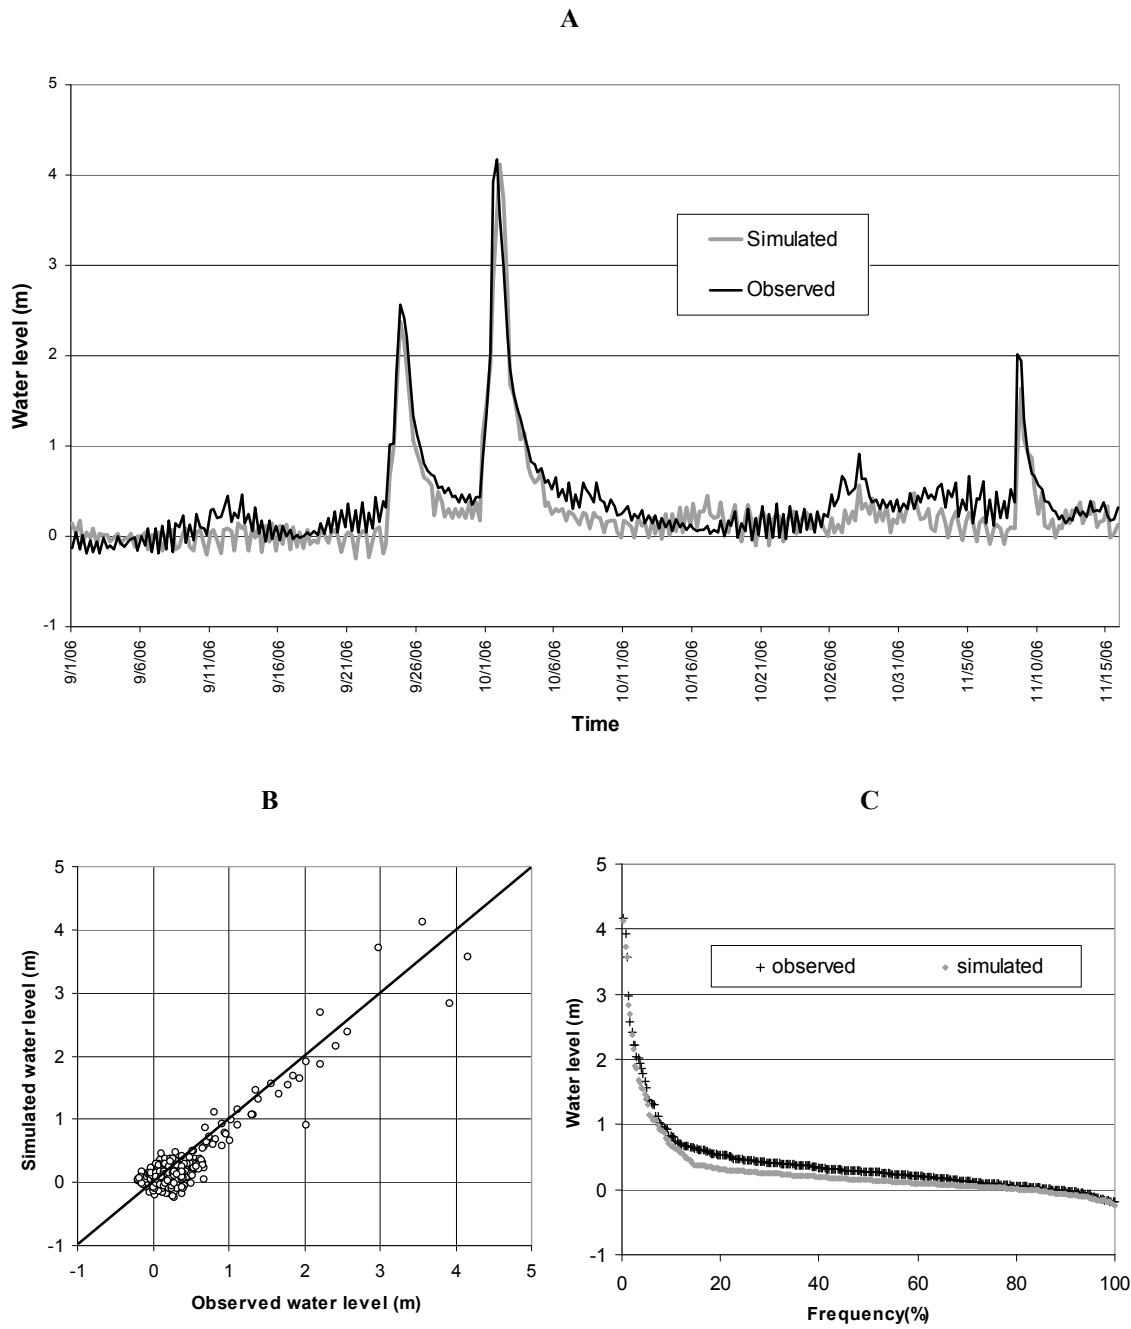

**Figure S8.** Comparison between simulated and observed water surface level for the 2006 flood season at the Kim Long gauging station at the Huong River: (a) observed and simulated 6-hourly water level versus time; (b) scatter plot of observed versus simulated water level; (c) ranked observed and simulated water level.

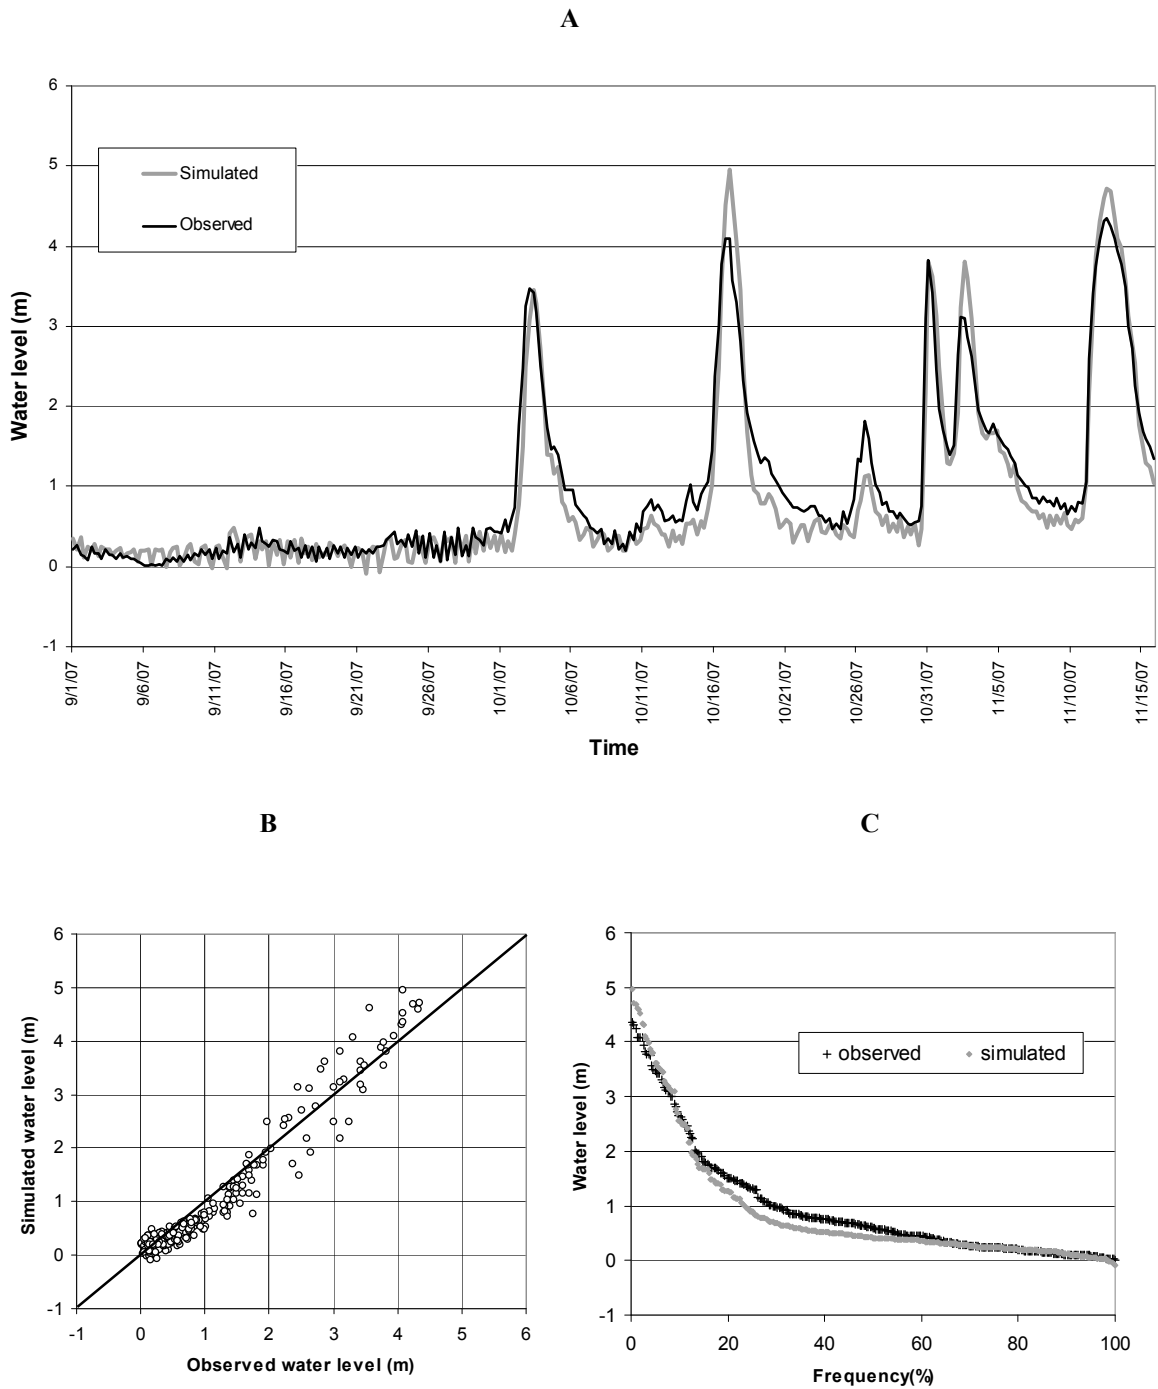

**Figure S9.** Comparison between simulated and observed water surface level for the 2007 flood season at the Kim Long gauging station at the Huong River: (a) observed and simulated 6-hourly water level versus time; (b) scatter plot of observed versus simulated water level; (c) ranked observed and simulated water level.
